# Supplementary material for: The evolutionary landscape of primate longevity
Source: Research Square preprint supplement (doi:10.21203/rs.3.rs-118237/v1), 2020-12-28
Supplement: Supplementary file 2 [file 2b8404ecec38fe4e28cb9f1c.zip]

Archive with 14 entries (11 files):
- ReprodCodeNCOMS-20-47536/
- ReprodCodeNCOMS-20-47536/.DS_Store
- __MACOSX/
- __MACOSX/ReprodCodeNCOMS-20-47536/
- __MACOSX/ReprodCodeNCOMS-20-47536/._.DS_Store
- ReprodCodeNCOMS-20-47536/testData.txt
- __MACOSX/ReprodCodeNCOMS-20-47536/._testData.txt
- ReprodCodeNCOMS-20-47536/BaSTA.ZIMS_1.0.2.tar.gz
- __MACOSX/ReprodCodeNCOMS-20-47536/._BaSTA.ZIMS_1.0.2.tar.gz
- ReprodCodeNCOMS-20-47536/ReprodCodeNCOMS-20-47536.R
- __MACOSX/ReprodCodeNCOMS-20-47536/._ReprodCodeNCOMS-20-47536.R
- ReprodCodeNCOMS-20-47536/README.pdf
- __MACOSX/ReprodCodeNCOMS-20-47536/._README.pdf
- __MACOSX/._ReprodCodeNCOMS-20-47536
