# Supplementary material for: The evolutionary landscape of primate longevity
Source: Research Square preprint supplement (doi:10.21203/rs.3.rs-118237/v1), 2020-12-28
Supplement: Supplementary file 2 [file 2b8404ecec38fe4e28cb9f1c.zip › ReprodCodeNCOMS-20-47536/testData.txt]

ID	Birth.Date	Min.Birth.Date	Max.Birth.Date	Entry.Date	Depart.Date	Depart.Type
1	1962-08-08	1962-08-08	1962-08-08	1962-08-08	1963-07-18	D
2	1955-08-23	1955-08-23	1955-08-23	1955-08-23	1958-02-19	D
3	1958-12-31	1958-12-31	1958-12-31	1958-12-31	1988-10-17	D
5	1961-09-23	1961-09-23	1961-09-23	1961-09-23	1995-10-30	D
6	1963-03-23	1963-03-23	1963-03-23	1963-03-23	1963-03-26	D
7	1955-12-10	1955-12-10	1955-12-10	1955-12-10	1956-09-03	D
8	1965-07-16	1965-07-16	1965-07-16	1965-07-16	1999-05-19	D
9	1958-06-06	1958-06-06	1958-06-06	1958-06-06	1995-07-09	D
10	1957-12-31	1957-12-31	1957-12-31	1957-12-31	1961-03-14	D
11	1958-03-12	1958-03-12	1958-03-12	1958-03-12	1994-12-12	D
12	1965-01-28	1965-01-28	1965-01-28	1965-01-28	1966-05-25	D
13	1967-03-21	1967-03-21	1967-03-21	1967-03-21	1998-11-02	D
14	1958-02-09	1958-02-09	1958-02-09	1958-02-09	1959-05-26	D
15	1957-12-13	1957-12-13	1957-12-13	1957-12-13	1958-12-16	D
16	1963-08-26	1963-08-26	1963-08-26	1963-08-26	2000-01-01	C
18	1962-09-17	1962-09-17	1962-09-17	1962-09-17	1963-09-16	D
19	1966-01-25	1966-01-25	1966-01-25	1966-01-25	1966-02-25	D
20	1959-06-08	1959-06-08	1959-06-08	1959-06-08	2000-01-01	C
21	1966-03-27	1966-03-27	1966-03-27	1966-03-27	1988-11-01	D
22	1969-03-19	1969-03-19	1969-03-19	1969-03-19	1969-07-26	D
23	1950-09-26	1950-01-01	1955-01-01	1955-01-01	1992-01-02	D
24	1965-07-18	1965-07-18	1965-07-18	1965-07-18	1997-01-21	D
25	1954-06-15	1950-01-01	1955-01-01	1955-01-01	1955-07-14	D
26	1954-05-31	1950-01-01	1955-01-01	1955-01-01	1984-06-06	D
27	1966-12-28	1966-12-28	1966-12-28	1966-12-28	2000-01-01	C
28	1958-04-12	1958-04-12	1958-04-12	1958-04-12	1959-03-12	D
29	1966-06-03	1966-06-03	1966-06-03	1966-06-03	2000-01-01	C
30	1955-06-07	1955-06-07	1955-06-07	1955-06-07	1970-08-12	D
31	1968-04-27	1968-04-27	1968-04-27	1968-04-27	1968-11-27	D
32	1953-11-12	1950-01-01	1955-01-01	1955-01-01	1998-07-12	D
33	1954-11-29	1950-01-01	1955-01-01	1955-01-01	1975-03-18	D
34	1964-07-25	1964-07-25	1964-07-25	1964-07-25	1966-06-03	D
35	1969-01-11	1969-01-11	1969-01-11	1969-01-11	1969-01-19	D
37	1963-08-19	1963-08-19	1963-08-19	1963-08-19	2000-01-01	C
38	1960-12-23	1960-12-23	1960-12-23	1960-12-23	1961-07-03	D
39	1959-01-08	1959-01-08	1959-01-08	1959-01-08	1959-07-23	D
40	1962-02-22	1962-02-22	1962-02-22	1962-02-22	1982-10-24	D
42	1954-07-25	1950-01-01	1955-01-01	1955-01-01	1986-08-24	D
43	1965-02-06	1965-02-06	1965-02-06	1965-02-06	2000-01-01	C
44	1967-01-31	1967-01-31	1967-01-31	1967-01-31	2000-01-01	C
45	1967-03-29	1967-03-29	1967-03-29	1967-03-29	1967-05-10	D
46	1969-09-15	1969-09-15	1969-09-15	1969-09-15	1970-06-11	D
47	1957-12-16	1957-12-16	1957-12-16	1957-12-16	1958-05-14	D
48	1952-07-26	1950-01-01	1955-01-01	1955-01-01	1976-05-14	D
49	1955-09-28	1955-09-28	1955-09-28	1955-09-28	1956-07-18	D
50	1966-01-12	1966-01-12	1966-01-12	1966-01-12	1966-01-25	D
52	1968-01-14	1968-01-14	1968-01-14	1968-01-14	1968-04-05	D
54	1959-11-28	1959-11-28	1959-11-28	1959-11-28	1960-03-14	D
55	1960-10-29	1960-10-29	1960-10-29	1960-10-29	1961-02-05	D
56	1954-06-27	1950-01-01	1955-01-01	1955-01-01	1995-05-24	D
57	1961-08-23	1961-08-23	1961-08-23	1961-08-23	1983-03-26	D
58	1955-06-01	1955-06-01	1955-06-01	1955-06-01	1955-09-18	D
59	1968-05-31	1968-05-31	1968-05-31	1968-05-31	1968-11-04	D
60	1955-11-16	1955-11-16	1955-11-16	1955-11-16	1990-02-19	D
61	1958-01-29	1958-01-29	1958-01-29	1958-01-29	2000-01-01	C
62	1958-03-29	1958-03-29	1958-03-29	1958-03-29	1994-06-15	D
63	1957-08-13	1957-08-13	1957-08-13	1957-08-13	1980-08-06	D
64	1955-03-06	1955-03-06	1955-03-06	1955-03-06	1957-04-15	D
65	1963-10-15	1963-10-15	1963-10-15	1963-10-15	1997-10-31	D
66	1952-06-02	1950-01-01	1955-01-01	1955-01-01	1957-12-16	D
68	1962-02-21	1962-02-21	1962-02-21	1962-02-21	1962-05-27	D
69	1954-12-19	1950-01-01	1955-01-01	1955-01-01	1984-04-08	D
70	1954-09-27	1950-01-01	1955-01-01	1955-01-01	1955-03-09	D
71	1957-01-21	1957-01-21	1957-01-21	1957-01-21	1957-05-03	D
72	1958-12-13	1958-12-13	1958-12-13	1958-12-13	1959-05-08	D
74	1967-12-15	1967-12-15	1967-12-15	1967-12-15	1967-12-26	D
75	1959-01-26	1959-01-26	1959-01-26	1959-01-26	1959-06-09	D
76	1958-07-13	1958-07-13	1958-07-13	1958-07-13	1995-01-03	D
77	1962-01-12	1962-01-12	1962-01-12	1962-01-12	2000-01-01	C
78	1968-01-10	1968-01-10	1968-01-10	1968-01-10	1968-05-04	D
79	1956-08-16	1956-08-16	1956-08-16	1956-08-16	1957-03-22	D
81	1969-07-15	1969-07-15	1969-07-15	1969-07-15	2000-01-01	C
82	1952-04-12	1950-01-01	1955-01-01	1955-01-01	1985-02-03	D
83	1956-03-10	1956-03-10	1956-03-10	1956-03-10	1956-08-16	D
85	1969-03-04	1969-03-04	1969-03-04	1969-03-04	1969-07-31	D
86	1963-10-30	1963-10-30	1963-10-30	1963-10-30	1964-04-09	D
87	1968-08-04	1968-08-04	1968-08-04	1968-08-04	1995-07-16	D
88	1957-01-03	1957-01-03	1957-01-03	1957-01-03	1975-07-04	D
89	1956-02-22	1956-02-22	1956-02-22	1956-02-22	1985-01-10	D
90	1964-07-27	1964-07-27	1964-07-27	1964-07-27	2000-01-01	C
91	1963-09-09	1963-09-09	1963-09-09	1963-09-09	1964-02-20	D
92	1951-10-14	1950-01-01	1955-01-01	1955-01-01	1962-11-01	D
94	1952-06-19	1950-01-01	1955-01-01	1955-01-01	1984-11-21	D
96	1968-07-09	1968-07-09	1968-07-09	1968-07-09	2000-01-01	C
97	1960-03-24	1960-03-24	1960-03-24	1960-03-24	1998-06-19	D
98	1964-01-14	1964-01-14	1964-01-14	1964-01-14	1964-05-23	D
99	1955-03-30	1955-03-30	1955-03-30	1955-03-30	1956-11-29	D
100	1960-11-27	1960-11-27	1960-11-27	1960-11-27	1960-12-12	D
101	1963-01-10	1963-01-10	1963-01-10	1963-01-10	1984-07-12	D
102	1952-11-02	1950-01-01	1955-01-01	1955-01-01	1992-05-02	D
103	1968-02-15	1968-02-15	1968-02-15	1968-02-15	1990-10-03	D
104	1959-11-09	1959-11-09	1959-11-09	1959-11-09	1975-12-30	D
105	1958-02-16	1958-02-16	1958-02-16	1958-02-16	1998-04-04	D
106	1963-09-18	1963-09-18	1963-09-18	1963-09-18	1963-10-25	D
107	1964-08-07	1964-08-07	1964-08-07	1964-08-07	2000-01-01	C
108	1960-04-01	1960-04-01	1960-04-01	1960-04-01	1979-09-22	D
109	1952-02-26	1950-01-01	1955-01-01	1955-01-01	1958-11-22	D
110	1954-02-08	1950-01-01	1955-01-01	1955-01-01	1955-07-27	D
112	1969-11-15	1969-11-15	1969-11-15	1969-11-15	2000-01-01	C
113	1954-10-03	1950-01-01	1955-01-01	1955-01-01	1957-01-26	D
114	1964-09-11	1964-09-11	1964-09-11	1964-09-11	2000-01-01	C
115	1959-11-27	1959-11-27	1959-11-27	1959-11-27	1991-07-25	D
116	1960-02-19	1960-02-19	1960-02-19	1960-02-19	1963-11-05	D
117	1961-11-19	1961-11-19	1961-11-19	1961-11-19	1999-06-25	D
118	1964-03-04	1964-03-04	1964-03-04	1964-03-04	1964-08-03	D
119	1956-01-30	1956-01-30	1956-01-30	1956-01-30	1988-02-27	D
120	1956-09-10	1956-09-10	1956-09-10	1956-09-10	1956-09-11	D
122	1960-12-01	1960-12-01	1960-12-01	1960-12-01	1964-10-19	D
123	1963-10-01	1963-10-01	1963-10-01	1963-10-01	1999-03-02	D
124	1963-07-13	1963-07-13	1963-07-13	1963-07-13	2000-01-01	C
125	1954-11-24	1950-01-01	1955-01-01	1955-01-01	1998-04-28	D
127	1964-07-19	1964-07-19	1964-07-19	1964-07-19	2000-01-01	C
129	1967-05-23	1967-05-23	1967-05-23	1967-05-23	2000-01-01	C
130	1964-06-22	1964-06-22	1964-06-22	1964-06-22	1965-03-31	D
131	1954-12-11	1950-01-01	1955-01-01	1955-01-01	1981-09-03	D
133	1963-09-20	1963-09-20	1963-09-20	1963-09-20	2000-01-01	C
134	1952-03-23	1950-01-01	1955-01-01	1955-01-01	1989-02-26	D
137	1957-05-14	1957-05-14	1957-05-14	1957-05-14	1979-06-24	D
138	1958-10-10	1958-10-10	1958-10-10	1958-10-10	1990-06-13	D
139	1968-04-18	1968-04-18	1968-04-18	1968-04-18	1968-09-26	D
140	1965-03-15	1965-03-15	1965-03-15	1965-03-15	1986-11-17	D
141	1950-08-09	1950-01-01	1955-01-01	1955-01-01	1985-06-06	D
142	1969-06-27	1969-06-27	1969-06-27	1969-06-27	2000-01-01	C
143	1954-02-12	1950-01-01	1955-01-01	1955-01-01	1955-03-05	D
144	1963-06-04	1963-06-04	1963-06-04	1963-06-04	1964-03-09	D
145	1959-05-18	1959-05-18	1959-05-18	1959-05-18	1960-07-14	D
146	1961-04-09	1961-04-09	1961-04-09	1961-04-09	1961-07-21	D
147	1964-03-20	1964-03-20	1964-03-20	1964-03-20	2000-01-01	C
148	1968-06-23	1968-06-23	1968-06-23	1968-06-23	1969-09-26	D
149	1963-11-26	1963-11-26	1963-11-26	1963-11-26	2000-01-01	C
150	1964-07-08	1964-07-08	1964-07-08	1964-07-08	1994-06-10	D
151	1966-12-05	1966-12-05	1966-12-05	1966-12-05	1967-03-01	D
152	1959-09-04	1959-09-04	1959-09-04	1959-09-04	1981-06-17	D
155	1963-12-29	1963-12-29	1963-12-29	1963-12-29	2000-01-01	C
156	1964-05-20	1964-05-20	1964-05-20	1964-05-20	2000-01-01	C
157	1960-02-25	1960-02-25	1960-02-25	1960-02-25	1993-05-21	D
158	1960-09-20	1960-09-20	1960-09-20	1960-09-20	2000-01-01	C
159	1963-10-16	1963-10-16	1963-10-16	1963-10-16	1963-12-19	D
160	1968-12-10	1968-12-10	1968-12-10	1968-12-10	1971-01-22	D
161	1958-06-10	1958-06-10	1958-06-10	1958-06-10	1993-08-03	D
162	1956-03-17	1956-03-17	1956-03-17	1956-03-17	1999-10-08	D
163	1960-05-15	1960-05-15	1960-05-15	1960-05-15	1997-08-07	D
164	1962-09-18	1962-09-18	1962-09-18	1962-09-18	1963-04-15	D
165	1961-04-02	1961-04-02	1961-04-02	1961-04-02	1961-04-24	D
166	1967-03-26	1967-03-26	1967-03-26	1967-03-26	1967-08-21	D
167	1967-06-07	1967-06-07	1967-06-07	1967-06-07	1968-04-06	D
168	1964-02-25	1964-02-25	1964-02-25	1964-02-25	2000-01-01	C
169	1965-12-19	1965-12-19	1965-12-19	1965-12-19	1987-11-11	D
170	1957-06-02	1957-06-02	1957-06-02	1957-06-02	1958-01-04	D
171	1967-10-27	1967-10-27	1967-10-27	1967-10-27	1969-04-10	D
172	1965-08-16	1965-08-16	1965-08-16	1965-08-16	1965-09-25	D
173	1960-04-17	1960-04-17	1960-04-17	1960-04-17	1990-06-05	D
174	1959-03-19	1959-03-19	1959-03-19	1959-03-19	1961-05-28	D
175	1962-10-04	1962-10-04	1962-10-04	1962-10-04	1963-06-25	D
176	1969-09-06	1969-09-06	1969-09-06	1969-09-06	1970-06-27	D
177	1967-04-18	1967-04-18	1967-04-18	1967-04-18	1998-10-27	D
178	1966-12-28	1966-12-28	1966-12-28	1966-12-28	2000-01-01	C
179	1967-11-21	1967-11-21	1967-11-21	1967-11-21	1968-02-28	D
181	1967-02-23	1967-02-23	1967-02-23	1967-02-23	1998-08-13	D
182	1953-12-15	1950-01-01	1955-01-01	1955-01-01	1984-08-18	D
183	1958-11-03	1958-11-03	1958-11-03	1958-11-03	2000-01-01	C
184	1959-11-25	1959-11-25	1959-11-25	1959-11-25	1960-12-24	D
185	1955-01-22	1955-01-22	1955-01-22	1955-01-22	1986-03-19	D
186	1963-07-06	1963-07-06	1963-07-06	1963-07-06	2000-01-01	C
187	1950-08-04	1950-01-01	1955-01-01	1955-01-01	1985-08-28	D
188	1967-03-25	1967-03-25	1967-03-25	1967-03-25	1968-06-21	D
189	1968-03-12	1968-03-12	1968-03-12	1968-03-12	2000-01-01	C
190	1967-11-16	1967-11-16	1967-11-16	1967-11-16	1971-05-03	D
191	1968-06-09	1968-06-09	1968-06-09	1968-06-09	1968-07-11	D
192	1956-06-05	1956-06-05	1956-06-05	1956-06-05	1979-04-20	D
193	1959-12-12	1959-12-12	1959-12-12	1959-12-12	1992-12-18	D
194	1961-06-27	1961-06-27	1961-06-27	1961-06-27	1973-10-25	D
195	1955-12-23	1955-12-23	1955-12-23	1955-12-23	1992-08-28	D
196	1960-04-17	1960-04-17	1960-04-17	1960-04-17	1960-07-20	D
197	1963-06-20	1963-06-20	1963-06-20	1963-06-20	2000-01-01	C
198	1969-10-19	1969-10-19	1969-10-19	1969-10-19	1970-01-18	D
199	1960-08-05	1960-08-05	1960-08-05	1960-08-05	1960-10-04	D
200	1956-10-25	1956-10-25	1956-10-25	1956-10-25	1958-04-16	D
